# Supplementary material for: Zinc protects against shiga-toxigenic Escherichia coli by acting on host tissues as well as on bacteria
Source: PubMed Central journal article supplement (PMC4072484; doi:10.1186/1471-2180-14-145), 2014-06-05
Supplement: 1471-2180-14-145-S2.pdf [file 1471-2180-14-145-S2.pdf]

Supplemental Table 1. Effects of Biometals at Multiple Phases of STEC and EPEC Pathogenesis.

| Metal:    | Luminal Phase    |                           |                              |                         |                                 | Epithelial Barrier and Translocation Phase                          |                                        | Stx Cellular Intoxication Phase             | Reference(s)         |
|-----------|------------------|---------------------------|------------------------------|-------------------------|---------------------------------|---------------------------------------------------------------------|----------------------------------------|---------------------------------------------|----------------------|
|           | LEE and adhesins | Cipro-induced <i>recA</i> | Cipro-induced <i>stx</i> RNA | Basal Stx Toxin protein | Cipro-induced Stx Toxin protein | Effects on H <sub>2</sub> O <sub>2</sub> -induced Epithelial Damage | Translocation of Stx Across Epithelium | Ability to Block Cell Death                 |                      |
| Zinc      | ↓                | ↓↓                        | ↓↓                           | ↓↓                      | ↓↓                              | ↓                                                                   | ↓↓                                     | n.d.                                        | This study           |
| Copper    | n.d.             | ---                       | ↓                            | n.d.                    | ↓↓                              | ---                                                                 | ↓↓                                     | n.d.                                        | This study and [1]   |
| Manganese | ↑                | ---                       | ↓                            | ↑                       | ---                             | ---                                                                 | ---; ↑ at 0.5 mM                       | ↓ for Stx1 in Hela cells; no effect on Stx2 | [1-4] and this study |
| Iron      | n.d.             | ---                       | ↑↑                           | n.d.                    | n.d.                            | --- or slight ↑                                                     | --- or slight ↑                        | n.d.                                        | [1]                  |
| Nickel    | n.d.             | ---                       | ↓↓                           | ↑                       | n.d.                            | ---                                                                 | ---                                    | n.d.                                        | [1]                  |

Legend: ---, no effect; ↓↓, ≥ 75% reduction; ↓, 50 to 75 % reduction; ↑, ≥ 2-fold increase; n.d., not done

#### References Cited in Supplemental Table

1. Crane JK, Byrd IW, Boedeker EC: **Virulence Inhibition by Zinc in Shiga-Toxigenic Escherichia coli.** *Infection and immunity* 2011, **79**:1696.
2. Beltrametti F, Kresse AU, Guzmán CA: **Transcriptional Regulation of the *esp* Genes of Enterohemorrhagic Escherichia coli.** *Journal of Bacteriology* 1999, **181**:3409-3418.
3. Mukhopadhyay S, Linstedt AD: **Manganese Blocks Intracellular Trafficking of Shiga Toxin and Protects Against Shiga Toxicosis.** *Science* 2012, **335**:332-335.
4. Gaston MA, Pellino CA, Weiss AA: **Failure of Manganese to Protect from Shiga Toxin.** *PLoS ONE* 2013, **8**:e69823.
